# Supplementary material for: Smoking Trends Among Adults With Behavioral Health Conditions in Integrated Health Care: A Retrospective Cohort Study
Source: Atypon-hosted journal article supplement (doi:10.1176/appi.ps.201500337), 2016-04-15
Supplement: appi.ps.201500337.ds001.pdf [file appi.ps.201500337.ds001.pdf]

**ANXIETY DISORDERS**

- 300.00 Anxiety disorder NOS
- 300.01 Panic disorder without agoraphobia
- 300.02 Generalized anxiety disorder
- 300.2 Phobia, unspecified
- 300.21 Panic disorder with agoraphobia
- 300.22 Agoraphobia without history of panic disorder
- 300.23 Social phobia (social anxiety disorder)
- 300.29 Specific phobia
- 300.3 Obsessive compulsive disorder
- 309.20 Adjustment disorders with anxiety
- 309.21 Separation anxiety disorder
- 309.24 Adjustment disorder with anxiety
- 309.81 Posttraumatic stress disorder
- 308.3 Acute Stress Disorder

**ATTENTION DEFICIT DISORDERS**

- 314.00 Attention deficit disorder, inattentive type
- 314.01 Attention deficit disorder, hyperactive/impulsive or combined type
- 314.1 Hyperkinesis with developmental delay
- 314.2 Hyperkinetic conduct disorder of childhood
- 314.8 Other specific manifests hyperkinetic syndrome, child
- 314.9 Attention deficit disorder NOS

**BIPOLAR SPECTRUM DISORDERS**

- 296.00 Bipolar I disorder, single manic episode, unspecified
- 296.01 Bipolar I disorder, single manic episode, mild
- 296.02 Bipolar I disorder, single manic episode, moderate
- 296.03 Bipolar I disorder, single manic episode, severe without psychosis
- 296.04 Bipolar I disorder, single manic episode, severe with psychosis
- 296.05 Bipolar I disorder, single manic episode, in partial remission
- 296.06 Bipolar I disorder, single manic episode, in full remission
- 296.1 Manic Recurrent episode
- 296.10 Manic disorder recurrent episode unspecified
- 296.11 Recurrent manic disorder, mild
- 296.12 Recurrent manic disorder, moderate
- 296.13 Recurrent manic disorder, severe
- 296.14 Manic affective disorder, recurrent episode, severe, specified as with psychotic behavior
- 296.15 Manic affective disorder, recurrent episode, in partial or unspecified remission
- 296.16 Recurrent manic disorder, full remission
- 296.40 Bipolar I disorder, most recent episode manic, unspecified
- 296.41 Bipolar I disorder, most recent episode manic, mild
- 296.42 Bipolar I disorder, most recent episode manic, moderate
- 296.43 Bipolar I disorder, most recent episode manic, severe without psychosis
- 296.44 Bipolar I disorder, most recent episode manic, severe with psychosis
- 296.45 Bipolar I disorder, most recent episode manic, in partial remission

- 296.46 Bipolar I disorder, most recent episode manic, in full remission
- 296.50 Bipolar I disorder, most recent episode depressed, unspecified
- 296.51 Bipolar I disorder, most recent episode depressed, mild
- 296.52 Bipolar I disorder, most recent episode depressed, moderate
- 296.53 Bipolar I disorder, most recent episode depressed, severe without psychosis
- 296.54 Bipolar I disorder, most recent episode depressed, severe with psychosis
- 296.55 Bipolar I disorder, most recent episode depressed, in partial remission
- 296.56 Bipolar I disorder, most recent episode depressed, in full remission
- 296.60 Bipolar I disorder, most recent episode mixed, unspecified
- 296.61 Bipolar I disorder, most recent episode mixed, mild
- 296.62 Bipolar I disorder, most recent episode mixed, moderate
- 296.63 Bipolar I disorder, most recent episode mixed, severe without psychosis
- 296.64 Bipolar I disorder, most recent episode mixed, severe with psychosis
- 296.65 Bipolar I disorder, most recent episode mixed, in partial remission
- 296.66 Bipolar I disorder, most recent episode mixed, in full remission
- 296.7 Bipolar I disorder, most recent episode unspecified
- 296.80 Bipolar disorder NOS
- 296.81 Atypical manic disorder
- 296.89 Bipolar II disorder
- 301.11 Chronic hypomanic disorder
- 301.13 Cyclothymic disorder

#### **DEPRESSIVE DISORDERS**

- 296.2 Major depression, single episode, unspecified
- 296.20 Major depression, single episode, unspecified
- 296.21 Major depression, single episode, mild
- 296.22 Major depression, single episode, moderate
- 296.23 Major depression, single episode, severe without psychosis
- 296.24 Major depression, single episode, severe with psychosis
- 296.25 Major depression, single episode, in partial remission
- 296.26 Major depression, single episode, in full remission
- 296.3 Major depression, recurrent, unspecified
- 296.30 Major depression, recurrent, unspecified
- 296.31 Major depression, recurrent, mild
- 296.32 Major depression, recurrent, moderate
- 296.33 Major depression, recurrent, severe without psychosis
- 296.34 Major depression, recurrent, severe with psychosis
- 296.35 Major depression, recurrent, in partial remission
- 296.36 Major depression, recurrent, in full remission
- 296.82 Atypical depressive disorder
- 298.0 Depressive type psychosis
- 300.4 Dysthymia
- 301.12 Chronic depressive personality disorder
- 311 Depressive disorder NOS
- 309.0 Adjustment disorder with depressed mood
- 309.1 Prolonged depressive reaction
- 309.28 Adjustment disorder with mixed anxiety and depressed mood

## **SUBSTANCE USE DISORDERS**

- 291 Alcohol-induced mental disorders
- 291.0 Alcohol withdrawal delirium
- 291.1 Alcohol-induced persisting amnestic disorder
- 291.2 Alcohol-induced persisting dementia
- 291.3 Alcohol-induced psychotic disorder with hallucinations
- 291.4 Idiosyncratic alcohol intoxication
- 291.5 Alcohol-induced psychotic disorder with delusions
- 291.8 Other specified alcohol-induced mental disorders
- 291.81 Alcohol withdrawal
- 291.82 Alcohol induced sleep disorders
- 291.89 Other alcohol-induced mental disorders
- 291.9 Unspecified alcohol-induced mental disorders
- 292 Drug-induced mental disorders
- 292.0 Drug withdrawal
- 292.1 Drug-induced psychotic disorders
- 292.11 Drug-induced psychotic disorder with delusions
- 292.12 Drug-induced psychotic disorder with hallucinations
- 292.2 Pathological drug intoxication
- 292.8 Other specified drug-induced mental disorders
- 292.81 Drug-induced delirium
- 292.82 Drug-induced persisting dementia
- 292.83 Drug-induced persisting amnestic disorder
- 292.84 Drug-induced mood disorder
- 292.85 Drug induced sleep disorders
- 292.89 Other specified drug-induced mental disorders
- 292.9 Unspecified drug-induced mental disorder
- 303 Alcohol dependence syndrome
- 303.0 Acute alcoholic intoxication
- 303.00 Acute alcoholic intoxication in alcoholism, unspecified
- 303.01 Acute alcoholic intoxication in alcoholism, continuous
- 303.02 Acute alcoholic intoxication in alcoholism, episodic
- 303.03 Acute alcoholic intoxication in alcoholism, in remission
- 303.9 Other and unspecified alcohol dependence
- 303.90 Other and unspecified alcohol dependence, unspecified
- 303.91 Other and unspecified alcohol dependence, continuous
- 303.92 Other and unspecified alcohol dependence, episodic
- 303.93 Other and unspecified alcohol dependence, in remission
- 304 Drug dependence
- 304.0 Opioid type dependence
- 304.00 Opioid type dependence, unspecified
- 304.01 Opioid type dependence, continuous
- 304.02 Opioid type dependence, episodic
- 304.03 Opioid type dependence, in remission
- 304.1 Sedative, hypnotic or anxiolytic dependence
- 304.10 Sedative, hypnotic or anxiolytic dependence, unspecified
- 304.11 Sedative, hypnotic or anxiolytic dependence, continuous
- 304.12 Sedative, hypnotic or anxiolytic dependence, episodic
- 304.13 Sedative, hypnotic or anxiolytic dependence, in remission
- 304.2 Cocaine dependence

304.20 Cocaine dependence, unspecified  
304.21 Cocaine dependence, continuous  
304.22 Cocaine dependence, episodic  
304.23 Cocaine dependence, in remission  
304.3 Cannabis dependence  
304.30 Cannabis dependence, unspecified  
304.31 Cannabis dependence, continuous  
304.32 Cannabis dependence, episodic  
304.33 Cannabis dependence, in remission  
304.4 Amphetamine and other psychostimulant dependence  
304.40 Amphetamine and other psychostimulant dependence, unspecified  
304.41 Amphetamine and other psychostimulant dependence, continuous  
304.42 Amphetamine and other psychostimulant dependence, episodic  
304.43 Amphetamine and other psychostimulant dependence, in remission  
304.5 Hallucinogen dependence  
304.50 Hallucinogen dependence, unspecified  
304.51 Hallucinogen dependence, continuous  
304.52 Hallucinogen dependence, episodic  
304.53 Hallucinogen dependence, in remission  
304.6 Other specified drug dependence  
304.60 Other specified drug dependence, unspecified  
304.61 Other specified drug dependence, continuous  
304.62 Other specified drug dependence, episodic  
304.63 Other specified drug dependence, in remission  
304.7 Combinations of opioid type drug with any other drug dependence  
304.70 Combinations of opioid type drug with any other drug dependence, unspecified  
304.71 Combinations of opioid type drug with any other drug dependence, continuous  
304.72 Combinations of opioid type drug with any other drug dependence, episodic  
304.73 Combinations of opioid type drug with any other drug dependence, in remission  
304.8 Combinations of drug dependence excluding opioid type drug  
304.80 Combinations of drug dependence excluding opioid type drug, unspecified  
304.81 Combinations of drug dependence excluding opioid type drug, continuous  
304.82 Combinations of drug dependence excluding opioid type drug, episodic  
304.83 Combinations of drug dependence excluding opioid type drug, in remission  
304.9 Unspecified drug dependence  
304.90 Unspecified drug dependence, unspecified  
304.91 Unspecified drug dependence, continuous  
304.92 Unspecified drug dependence, episodic  
304.93 Unspecified drug dependence, in remission  
305 Nondependent abuse of drugs  
305.0 Nondependent alcohol abuse  
305.00 Alcohol abuse, unspecified  
305.01 Alcohol abuse, continuous  
305.02 Alcohol abuse, episodic  
305.03 Alcohol abuse, in remission  
305.2 Nondependent cannabis abuse  
305.20 Cannabis abuse, unspecified  
305.21 Cannabis abuse, continuous  
305.22 Cannabis abuse, episodic  
305.23 Cannabis abuse, in remission

305.3 Nondependent hallucinogen abuse  
305.30 Hallucinogen abuse, unspecified  
305.31 Hallucinogen abuse, continuous  
305.32 Hallucinogen abuse, episodic  
305.33 Hallucinogen abuse, in remission  
305.4 Nondependent sedative, hypnotic or anxiolytic abuse  
305.40 Sedative, hypnotic or anxiolytic abuse, unspecified  
305.41 Sedative, hypnotic or anxiolytic abuse, continuous  
305.42 Sedative, hypnotic or anxiolytic abuse, episodic  
305.43 Sedative, hypnotic or anxiolytic abuse, in remission  
305.5 Nondependent opioid abuse  
305.50 Opioid abuse, unspecified  
305.51 Opioid abuse, continuous  
305.52 Opioid abuse, episodic  
305.53 Opioid abuse, in remission  
305.6 Nondependent cocaine abuse  
305.60 Cocaine abuse, unspecified  
305.61 Cocaine abuse, continuous  
305.62 Cocaine abuse, episodic  
305.63 Cocaine abuse, in remission  
305.7 Nondependent amphetamine or related acting sympathomimetic abuse  
305.70 Amphetamine or related acting sympathomimetic abuse, unspecified  
305.71 Amphetamine or related acting sympathomimetic abuse, continuous  
305.72 Amphetamine or related acting sympathomimetic abuse, episodic  
305.73 Amphetamine or related acting sympathomimetic abuse, in remission  
305.8 Nondependent antidepressant type abuse  
305.80 Antidepressant type abuse, unspecified  
305.81 Antidepressant type abuse, continuous  
305.82 Antidepressant type abuse, episodic  
305.83 Antidepressant type abuse, in remission  
305.9 Nondependent other mixed or unspecified drug abuse  
305.90 Other, mixed, or unspecified drug abuse, unspecified  
305.91 Other, mixed, or unspecified drug abuse, continuous  
305.92 Other, mixed, or unspecified drug abuse, episodic  
305.93 Other, mixed, or unspecified drug abuse, in remission
